# Supplementary material for: Rotavirus group A genotype circulation patterns across Kenya before and after nationwide vaccine introduction, 2010–2018
Source: PubMed Central journal article supplement (PMC7359451; doi:10.1186/s12879-020-05230-0), 2020-07-13

# Supplementary Figure 1

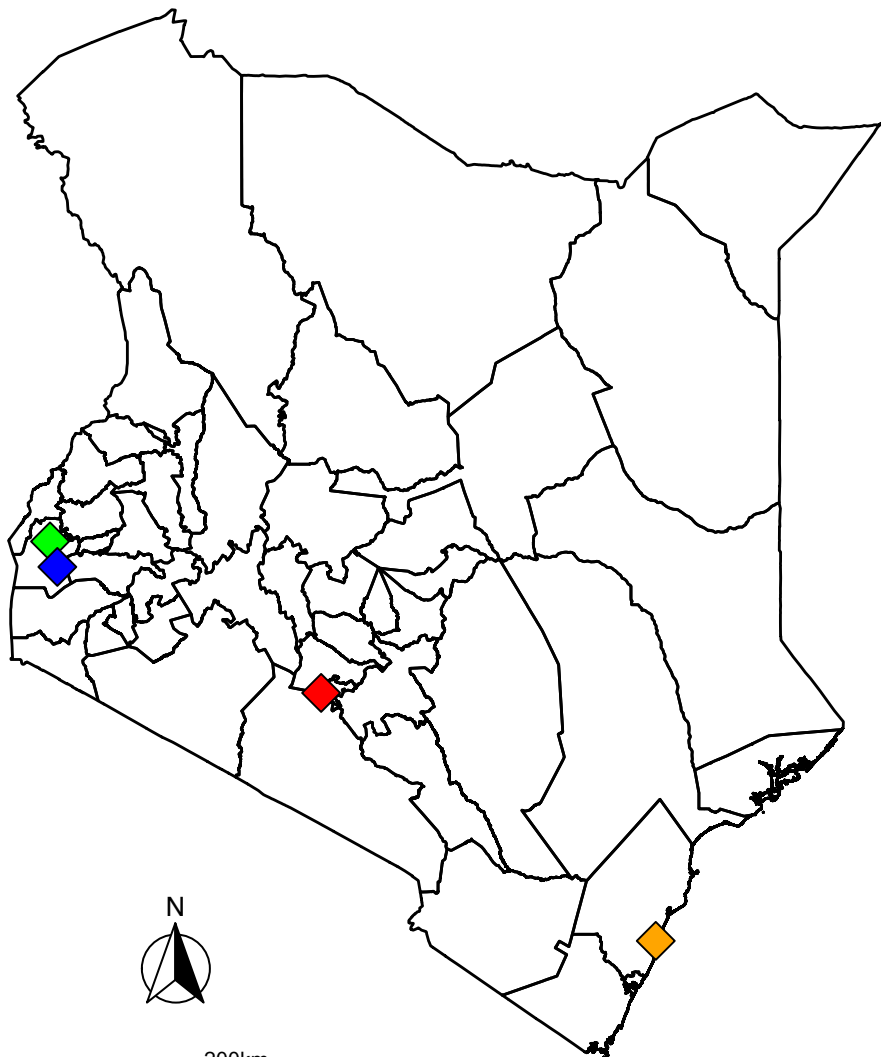

Supplement: 12879_2020_5230_MOESM1_ESM.pdf [file 12879_2020_5230_MOESM1_ESM.pdf]
