# Supplementary material for: Rotavirus group A genotype circulation patterns across Kenya before and after nationwide vaccine introduction, 2010–2018
Source: Springer Nature journal article supplement (doi:10.1186/s12879-020-05230-0), 2020-07-13
Supplement: MOESM2 [file 18177960]

Supplementary Table 1

| Genotype | 2010 |      | 2011 |      | 2012 |      | 2013 |      | 2014 |      | 2015 |      | 2016 |      | 2017 |      | 2018 |      | Total |      |
|----------|------|------|------|------|------|------|------|------|------|------|------|------|------|------|------|------|------|------|-------|------|
|          | n    | %    | n    | %    | n    | %    | n    | %    | n    | %    | n    | %    | n    | %    | n    | %    | n    | %    | n     | %    |
| G1P[x]   | 7    | 28.0 | 3    | 37.5 | 1    | 6.7  | 5    | 31.3 | 2    | 20.0 | 3    | 21.4 | 1    | 25.0 | 0    | 0.0  | 3    | 18.8 | 25    | 22.1 |
| G2P[x]   | 0    | 0.0  | 0    | 0.0  | 0    | 0.0  | 0    | 0.0  | 1    | 10.0 | 0    | 0.0  | 0    | 0.0  | 1    | 20.0 | 0    | 0.0  | 2     | 1.8  |
| G3P[x]   | 0    | 0.0  | 0    | 0.0  | 0    | 0.0  | 3    | 18.8 | 4    | 40.0 | 1    | 7.1  | 2    | 50.0 | 1    | 20.0 | 3    | 18.8 | 14    | 12.4 |
| G8P[x]   | 4    | 16.0 | 0    | 0.0  | 2    | 13.3 | 0    | 0.0  | 0    | 0.0  | 0    | 0.0  | 0    | 0.0  | 0    | 0.0  | 0    | 0.0  | 6     | 5.3  |
| G9P[x]   | 1    | 4.0  | 1    | 12.5 | 1    | 6.7  | 0    | 0.0  | 0    | 0.0  | 1    | 7.1  | 0    | 0.0  | 0    | 0.0  | 0    | 0.0  | 4     | 3.5  |
| G12P[x]  | 4    | 16.0 | 1    | 12.5 | 2    | 13.3 | 0    | 0.0  | 0    | 0.0  | 0    | 0.0  | 0    | 0.0  | 1    | 20.0 | 2    | 12.5 | 10    | 8.8  |
| G29P[x]  | 1    | 4.0  | 0    | 0.0  | 0    | 0.0  | 0    | 0.0  | 0    | 0.0  | 0    | 0.0  | 0    | 0.0  | 0    | 0.0  | 0    | 0.0  | 1     | 0.9  |
| GxP[8]   | 5    | 20.0 | 3    | 37.5 | 5    | 33.3 | 6    | 37.5 | 3    | 30.0 | 9    | 64.3 | 0    | 0.0  | 1    | 20.0 | 4    | 25.0 | 36    | 31.9 |
| GxP[4]   | 3    | 12.0 | 0    | 0.0  | 4    | 26.7 | 2    | 12.5 | 0    | 0.0  | 0    | 0.0  | 1    | 25.0 | 1    | 20.0 | 4    | 25.0 | 15    | 13.3 |
| Total    | 25   |      | 8    |      | 15   |      | 16   |      | 10   |      | 14   |      | 4    |      | 5    |      | 16   |      | 113   |      |
