# Supplementary material for: Rotavirus group A genotype circulation patterns across Kenya before and after nationwide vaccine introduction, 2010–2018
Source: Springer Nature journal article supplement (doi:10.1186/s12879-020-05230-0), 2020-07-13
Supplement: MOESM3 [file 18177960]

## Supplementary table 2

GenBank accession numbers of all VP7 G gene sequences

|          |          |          |          |          |          |          |          |          |
|----------|----------|----------|----------|----------|----------|----------|----------|----------|
| MH402630 | MH402616 | MH402431 | MH402303 | MN194502 | MH402228 | MH402204 | MH402731 | MH402190 |
| MH402179 | MH402639 | MH402105 | MH402336 | MH402692 | MH402515 | MH402124 | MH402728 | MH402382 |
| MH402670 | MH402436 | MH402195 | MH402347 | MH402693 | MH402283 | MH402238 | MH402333 | MH402122 |
| MH402528 | MH402624 | MH402219 | MH402337 | MH402713 | MH402385 | MH402696 | MH402746 | MH402193 |
| MH402181 | MH402617 | MH402202 | MH402350 | MH402632 | MH402525 | MH402276 | MH402335 | MH402212 |
| MH402628 | MH402695 | MH402218 | MH402317 | MH402619 | MH402142 | MH402271 | MH402376 | MH402194 |
| MH402689 | MH402452 | MH402203 | MH402292 | MH402408 | MH402180 | MH402423 | MH402729 | MH402104 |
| MH402389 | MH402774 | MH402215 | MH402322 | MH402656 | MN194417 | MN194416 | MH402334 | MH402191 |
| MH402653 | MH402722 | MH402196 | MH402312 | MH402416 | MH402095 | MH402701 | MH402753 | MH402210 |
| MH402675 | MH402775 | MH402300 | MH402357 | MH402627 | MN194423 | MH402279 | MH402747 | MH402189 |
| MH402644 | MH402116 | MH402192 | MH402368 | MN194493 | MN194500 | MH402216 | MH402773 | MH402456 |
| MH402676 | MH402776 | MH402213 | MH402346 | MH402229 | MN194421 | MN194412 | MH402748 | MH402768 |
| MH402654 | MH402626 | MH402422 | MH402342 | MH402715 | MN194428 | MH402112 | MH402777 | MH402440 |
| MH402420 | MH402663 | MH402266 | MH402373 | MH402633 | MH402284 | MH402217 | MH402752 | MH402438 |
| MH402679 | MH402618 | MH402384 | MH402313 | MH402411 | MN194422 | MH402243 | MH402749 | MH402439 |
| MH402677 | MH402723 | MH402262 | MH402359 | MH402287 | MH402516 | MH402201 | MH402750 | MH402441 |
| MH402629 | MH402661 | MN194487 | MH402360 | MH402079 | MH402523 | MH402254 | MH402751 | MH402310 |
| MH402678 | MH402642 | MH402268 | MH402321 | MH402414 | MH402517 | MH402275 | MH402732 | MH402457 |
| MH402641 | MH402643 | MH402277 | MH402370 | MH402395 | MH402129 | MH402272 | MH402739 | MH402704 |
| MH402706 | MH402394 | MH402265 | MH402351 | MN194494 | MH402080 | MH402088 | MH402740 | MH402315 |
| MH402648 | MH402637 | MH402383 | MH402325 | MH402291 | MH402130 | MH402205 | MH402741 | MH402718 |
| MH402657 | MH402100 | MH402299 | MH402374 | MH402714 | MH402131 | MH402121 | MH402742 | MH402719 |
| MH402680 | MH402662 | MH402106 | MH402327 | MH402409 | MH402132 | MH402697 | MH402733 | MH402606 |
| MH402649 | MH402087 | MH402417 | MH402330 | MH402103 | MH402521 | MN194504 | MN194381 | MH402182 |
| MH402658 | MH402655 | MH402273 | MH402339 | MH402306 | MH402437 | MH402248 | MH402734 | MH402772 |
| MH402659 | MH402510 | MH402118 | MH402361 | MH402620 | MH402518 | MH402258 | MH402735 | MH402614 |
| MH402631 | MH402399 | MH402207 | MH402328 | MH402589 | MH402133 | MH402220 | MH402736 | MH402726 |
| MH402671 | MH402724 | MH402700 | MH402340 | MH402290 | MH402134 | MH402699 | MH402744 | MH402602 |
| MH402600 | MH402527 | MH402197 | MH402358 | MN194429 | MH402135 | MH402698 | MH402754 | MH402720 |
| MH402102 | MH402396 | MH402286 | MH402354 | MH402412 | MH402136 | MH402267 | MH402743 | MH402672 |
| MH402650 | MH402148 | MH402107 | MH402331 | MH402392 | MH402522 | MH402113 | MH402755 | MH402635 |
| MH402449 | MH402302 | MH402214 | MH402349 | MN194410 | MH402096 | MH402278 | MH402737 | MH402413 |
| MH402673 | MH402169 | MH402250 | MN194406 | MH402450 | MH402781 | MH402255 | MH402745 | MH402660 |
| MH402587 | MH402304 | MH402208 | MH402356 | MH402610 | MH402519 | MH402260 | MH402778 | MH402621 |
| MH402117 | MH402400 | MH402199 | MH402353 | MH402167 | MH402756 | MH402281 | MH402738 | MH402101 |
| MH402603 | MH402149 | MH402246 | MH402329 | MH402230 | MH402757 | MH402282 | MK434749 | MH402512 |
| MH402607 | MH402126 | MH402245 | MH402345 | MH402770 | MH402186 | MH402256 | MK434565 | MH402687 |
| MH402588 | MH402150 | MH402235 | MH402343 | MH402231 | MH402520 | MH402779 | MK434616 | MH402415 |
| MN194491 | MH402184 | MH402251 | MH402311 | MH402611 | MH402758 | MH402200 | MK434580 | MH402424 |
| MH402608 | MN194420 | MH402252 | MH402318 | MH402645 | MH402425 | MH402612 | MK434566 | MH402721 |
| MN194501 | MH402174 | MN194414 | MH402369 | MH402646 | MH402759 | MH402239 | MK434768 | MH402615 |
| MH402308 | MN194425 | MH402125 | MH402355 | MH402085 | MH402760 | MH402114 | MN194408 | MH402622 |
| MH402593 | MH402171 | MH402432 | MH402341 | MH402232 | MH402139 | MH402115 | MN194448 | MH402240 |
| MH402609 | MH402185 | MH402257 | MH402323 | MH402640 | MH402761 | MH402144 | MN194456 | MH402623 |
| MN194503 | MH402224 | MH402263 | MH402362 | MH402428 | MH402097 | MN194413 | MN194449 | MN194452 |
| MH402664 | MH402198 | MH402253 | MH402352 | MH402444 | MH402137 | MH402707 | MN194463 | MN194470 |
| MH402651 | MN194418 | MH402108 | MH402348 | MH402446 | MH402524 | MH402709 | MN194405 | MN194469 |

|          |          |          |          |          |          |          |          |          |
|----------|----------|----------|----------|----------|----------|----------|----------|----------|
| MH402604 | MH402301 | MH402225 | MH402379 | MH402140 | MH402098 | MH402674 | MN194457 | MN194461 |
| MH402716 | MH402288 | MH402236 | MH402371 | MH402445 | MH402285 | MH402710 | MN194495 | MN194445 |
| MN194411 | MH402233 | MH402123 | MH402314 | MH402447 | MH402762 | MH402401 | MN194453 | MN194446 |
| MN194492 | MH402127 | MH402244 | MH402316 | MH402702 | MH402089 | MH402305 | MN194505 | MN194385 |
| MH402690 | MH402727 | MH402259 | MH402326 | MH402429 | MH402090 | MH402708 | MN194465 | MN194447 |
| MH402652 | MH402514 | MH402280 | MH402380 | MN194488 | MH402763 | MH402264 | MN194458 | MN194394 |
| MH402711 | MH402128 | MH402269 | MH402338 | MN194497 | MH402764 | MH402433 | MN194440 | MN194437 |
| MH402453 | MH402172 | MH402242 | MH402319 | MH402086 | MH402769 | MH402206 | MN194379 | MN194393 |
| MH402605 | MH402146 | MH402227 | MH402344 | MH402430 | MH402451 | MH402638 | MN194459 | MN194434 |
| MH402309 | MN194419 | MH402261 | MH402363 | MH402454 | MH402526 | MH402421 | MN194392 | MN194464 |
| MN194489 | MH402145 | MH402109 | MH402372 | MH402458 | MH402091 | MH402434 | MN194460 | MN194468 |
| MH402725 | MH402170 | MH402119 | MH402332 | MN194499 | MH402092 | MH402594 | MN194454 | MN194467 |
| MH402634 | MN194490 | MH402110 | MH402365 | MH402187 | MH402138 | MH402665 | MN194450 | MN194378 |
| MH402691 | MH402397 | MH402241 | MH402320 | MN194498 | MH402093 | MH402601 | MN194390 | MN194435 |
| MH402712 | MN194424 | MH402120 | MH402378 | MN194496 | MH402426 | MH402668 | MN194444 | MN194432 |
| MH402717 | MN194426 | MH402249 | MH402366 | MH402455 | MH402141 | MH402613 | MN194443 | MN194484 |
| MH402406 | MN194427 | MH402111 | MH402367 | MH402234 | MH402765 | MH402435 | MN194442 | MN194485 |
| MH402694 | MN194441 | MH402247 | MH402381 | MN194415 | MH402448 | MN194384 | MN194466 | MN194462 |
| MH402410 | MN194383 | MH402274 | MH402375 | MH402188 | MH402427 | MH402771 | MN194471 | MH402393 |
| MH402289 | MH402173 | MH402209 | MH402377 | MN194486 | MH402094 | MH402703 | MN194455 | MH402767 |
| MH402407 | MH402147 | MH402270 | MH402324 | MH402211 | MH402766 | MH402625 | MN194451 | MK434596 |
| MH402780 | MH402151 | MH402237 | MH402364 | MH402183 | MK434705 | MK434804 | MN194374 | MK434790 |
| MK434786 | MN194472 | MK434744 | MK434821 | MK434757 | MK434644 | MK434801 | MK434823 | MN194375 |
| MK434635 | MK434701 | MK434745 | MK434727 | MK434845 | MK434775 | MK434654 | MK434631 | MN194404 |
| MK434685 | MK434623 | MK434742 | MK434657 | MK434824 | MK434787 | MK434679 | MK434788 | MN194388 |
| MK434649 | MK434735 | MK434743 | MK434722 | MK434572 | MK434776 | MK434816 | MK434717 | MN194506 |
| MK434728 | MK434687 | MK434681 | MK434643 | MK434830 | MK434671 | MK434803 | MK434698 | MN194377 |
| MK434636 | MK434689 | MK434759 | MK434627 | MK434602 | MK434777 | MK434642 | MK434832 | MK434766 |
| MK434650 | MK434700 | MK434677 | MK434752 | MK434573 | MK434793 | MK434624 | MK434670 | MK434668 |
| MK434646 | MK434736 | MK434606 | MK434822 | MK434828 | MK434754 | MK434802 | MK434651 | MK434672 |
| MK434704 | MK434690 | MK434568 | MK434665 | MK434846 | MK434833 | MK434798 | MK434827 | MK434713 |
| MK434641 | MK434613 | MK434594 | MK434628 | MK434796 | MK434706 | MK434780 | MK434729 | MK434593 |
| MK434640 | MK434694 | MK434608 | MK434753 | MK434834 | MK434707 | MK434781 | MK434737 | MK434664 |
| MK434633 | MK434588 | MK434686 | MK434666 | MK434829 | MK434708 | MK434653 | MK434712 | MK434620 |
| MK434732 | MK434688 | MK434582 | MK434629 | MK434587 | MK434709 | MK434785 | MK434711 | MK434621 |
| MK434637 | MK434792 | MK434583 | MK434630 | MK434612 | MK434710 | MK434784 | MK434844 | MK434680 |
| MK434778 | MK434771 | MK434609 | MK434741 | MK434726 | MK434617 | MK434818 | MK434797 | MK434718 |
| MK434647 | MK434699 | MK434599 | MK434740 | MK434751 | MK434600 | MK434618 | MK434634 | MK434714 |
| MK434638 | MK434695 | MK434603 | MK434738 | MK434576 | MK434755 | MK434703 | MK434730 | MK434716 |
| MK434795 | MK434696 | MK434584 | MK434673 | MK434767 | MK434570 | MK434715 | MK434747 | MK434772 |
| MK434622 | MK434697 | MK434569 | MK434758 | MK434577 | MK434590 | MK434683 | MK434805 | MK434765 |
| MK434648 | MK434782 | MK434611 | MK434674 | MK434604 | MK434574 | MK434682 | MK434601 | MK434836 |
| MK434663 | MK434693 | MK434585 | MK434791 | MK434598 | MK434579 | MK434847 | MK434691 | MK434814 |
| MK434799 | MK434667 | MK434760 | MK434748 | MK434571 | MK434575 | MK434819 | MK434806 | MN194387 |
| MK434800 | MK434723 | MK434763 | MK434678 | MK434578 | MK434769 | MK434820 | MK434615 | MK434597 |
| MK434656 | MK434655 | MK434763 | MK434719 | MK434659 | MK434586 | MK434817 | MK434808 | MK434605 |
| MK434676 | MK434652 | MK434770 | MK434567 | MK434756 | MK434591 | MK434625 | MK434734 | MK434813 |

|          |          |          |          |          |          |          |          |          |
|----------|----------|----------|----------|----------|----------|----------|----------|----------|
| MK434794 | MK434750 | MK434761 | MK434645 | MK434826 | MK434592 | MK434626 | MK434783 | MK434811 |
| MK434731 | MK434774 | MK434839 | MK434660 | MK434831 | MK434675 | MN194402 | MN194389 | MK434842 |
| MK434632 | MK434614 | MK434815 | MK434733 | MK434825 | MK434607 | MN194396 | MN194436 | MK434838 |
| MK434779 | MK434724 | MK434789 | MK434746 | MK434589 | MK434595 | MN194398 | MN194507 | MK434843 |
| MK434639 | MK434692 | MK434809 | MK434661 | MK434837 | MK434721 | MN194479 | MN194391 | MK434807 |
| MK434658 | MK434720 | MK434764 | MK434662 | MK434812 | MK434610 | MN194474 | MN194380 | MK434841 |
| MK434725 | MK434702 | MK434810 | MK434669 | MN194373 | MK434581 | MN194403 | MN194438 | MK434684 |
| MK434835 | MK434773 | MK434762 | MK434619 | MK434840 | MK434739 | MN194481 | MN194386 | MN194382 |
| MN194476 | MN194483 | MN194430 | MN194477 | MN194399 | MN194480 | MN194433 | MN194431 | MN194397 |
| MN194400 | MN194475 | MN194401 | MN194509 | MN194478 | MN194473 | MN194482 | MN194409 | MN194439 |
| MN194376 | MN194395 | MN194407 | MN194508 |          |          |          |          |          |
