# Supplementary material for: Rotavirus group A genotype circulation patterns across Kenya before and after nationwide vaccine introduction, 2010–2018
Source: Springer Nature journal article supplement (doi:10.1186/s12879-020-05230-0), 2020-07-13
Supplement: MOESM4 [file 18177960]

### Supplementary table 3

GenBank accession numbers of all VP4 G gene sequences

|          |          |          |          |          |          |          |          |          |
|----------|----------|----------|----------|----------|----------|----------|----------|----------|
| MH403257 | MH403192 | MH403266 | MH403487 | MH403441 | MK434361 | MH402811 | MH403501 | MH403237 |
| MK434500 | MH403405 | MH402930 | MH403485 | MH403338 | MK434454 | MH402818 | MH403534 | MH403300 |
| MK434400 | MH403178 | MH402844 | MH402968 | MH403339 | MK434479 | MH402812 | MH403474 | MH403435 |
| MK434397 | MH403171 | MH403411 | MH403480 | MH403232 | MK434485 | MH402838 | MH403517 | MH403301 |
| MK434402 | MH403172 | MH403542 | MH402973 | MN194350 | MK434435 | MH402866 | MH403533 | MH403302 |
| MK434383 | MH403216 | MH403273 | MH402994 | MH403200 | MK434381 | MH402862 | MH403514 | MH403303 |
| MK434399 | MH403004 | MH403187 | MH402986 | MH403317 | MK434447 | MN194275 | MH403502 | MH403438 |
| MK434403 | MN194345 | MH403446 | MH402983 | MH403156 | MK434416 | MH402863 | MH403493 | MH403304 |
| MK434407 | MH403176 | MH403412 | MH402982 | MN194360 | MK434392 | MH403164 | MH403524 | MH403423 |
| MK434553 | MH403179 | MH403365 | MH402984 | MH403000 | MK434424 | MH402841 | MH403475 | MH403440 |
| MK434391 | MH403180 | MH402928 | MH402970 | MH403424 | MK434425 | MH403361 | MH403471 | MH403305 |
| MK434404 | MH403207 | MH403413 | MH402971 | MN194347 | MK434436 | MH402819 | MH403531 | MH403217 |
| MK434396 | MH403357 | MH402837 | MH402972 | MH403428 | MK434455 | MH402820 | MH403510 | MH403227 |
| MK434458 | MN194357 | MH402788 | MH402974 | MH403236 | MK434382 | MH403277 | MH403520 | MH403401 |
| MK434384 | MH403181 | MH402876 | MH402987 | MH403228 | MK434350 | MH402821 | MH403521 | MH403377 |
| MK434398 | MH403241 | MH402873 | MH402991 | MH403225 | MK434426 | MN194274 | MH403530 | MH403231 |
| MK434395 | MH403185 | MH403366 | MN194266 | MH403155 | MK434417 | MH402881 | MH403511 | MH403201 |
| MK434387 | MH403222 | MH402921 | MH402989 | MH403318 | MK434356 | MH403362 | MH403503 | MH403255 |
| MK434388 | MH403246 | MH403414 | MH402980 | MH402953 | MK434444 | MH402791 | MH403496 | MN194346 |
| MK434516 | MH403206 | MH403450 | MH402993 | MH403214 | MK434393 | MH402950 | MH403518 | MH403306 |
| MK434518 | MH403385 | MH403380 | MH402975 | MN194348 | MK434511 | MH402867 | MH403538 | MH403101 |
| MK434524 | MH403182 | MH403382 | MH402992 | MH402854 | MK434427 | MH402813 | MH403529 | MH403437 |
| MK434389 | MH403559 | MH402833 | MH402976 | MH403319 | MK434428 | MH402830 | MH403497 | MH403307 |
| MK434394 | MH403342 | MH403161 | MH402981 | MH403215 | MK434484 | MH402822 | MH403506 | MH403221 |
| MK434525 | MH403386 | MH403267 | MH402990 | MH403320 | MK434378 | MH402847 | MH403505 | MH403218 |
| MK434385 | MH403343 | MH402952 | MH402988 | MH403006 | MK434429 | MH402852 | MH403494 | MH403229 |
| MK434478 | MH403387 | MH403268 | MH402985 | MH403340 | MK434406 | MH402856 | MH403476 | MH403220 |
| MK434526 | MH403203 | MH402834 | MH402977 | MH403544 | MK434430 | MH402955 | MH403495 | MH403238 |
| MK434482 | MH403388 | MH403398 | MH402995 | MH403419 | MK434550 | MH402793 | MH403526 | MH403335 |
| MK434405 | MH403212 | MH402882 | MH402979 | MH403321 | MK434357 | MH402883 | MH403492 | MH403173 |
| MK434453 | MH403324 | MN194352 | MH402978 | MH403005 | MK434431 | MH402875 | MH403484 | MH403346 |
| MK434411 | MH403389 | MH403269 | MK434376 | MH402931 | MK434432 | MH402845 | MH403477 | MH403166 |
| MK434374 | MH403430 | MH403270 | MK434349 | MH403451 | MK434551 | MH402817 | MN194292 | MH403308 |
| MK434373 | MH403396 | MH402855 | MK434336 | MH402926 | MK434552 | MH402933 | MH403478 | MH403239 |
| MK434365 | MH403390 | MH403399 | MK434360 | MN194355 | MK434549 | MH403381 | MH403481 | MH403336 |
| MK434366 | MH403391 | MH403276 | MK434355 | MH403193 | MK434498 | MH402839 | MH403482 | MH403253 |
| MK434367 | MH403425 | MH403367 | MN194325 | MH402932 | MK434351 | MH403174 | MH403528 | MH403347 |
| MK434368 | MH402935 | MH403368 | MN194339 | MH403330 | MK434337 | MH403363 | MH403479 | MH403439 |
| MK434563 | MH403350 | MH403442 | MN194311 | MH403378 | MK434362 | MH402831 | MH403527 | MH403309 |
| MK434369 | MH403433 | MN194353 | MN194335 | MH403233 | MK434352 | MN194273 | MH403525 | MH403310 |
| MK434370 | MH402937 | MH403369 | MN194312 | MH402865 | MK434338 | MH403250 | MH403489 | MH403337 |
| MK434372 | MH402936 | MH403271 | MN194291 | MH403458 | MK434433 | MH402927 | MH403483 | MH403431 |

|          |          |          |          |          |          |          |          |          |
|----------|----------|----------|----------|----------|----------|----------|----------|----------|
| MK434408 | MH403397 | MH403370 | MN194313 | MH403202 | MK434386 | MH402956 | MH403490 | MH403213 |
| MK434519 | MH402938 | MH403332 | MN194343 | MH402794 | MK434437 | MH402814 | MH403491 | MH403311 |
| MK434520 | MH403550 | MH403421 | MN194336 | MH402877 | MK434438 | MH402815 | MH403508 | MN194349 |
| MK434371 | MH402947 | MH403400 | MN194314 | MH402843 | MK434434 | MH403364 | MH403504 | MH403249 |
| MK434515 | MH403358 | MH403420 | MN194315 | MN194358 | MK434439 | MH403409 | MH403535 | MH403312 |
| MK434534 | MH402939 | MH403371 | MN194333 | MH402859 | MK434364 | MH402919 | MH403499 | MH403313 |
| MK434521 | MH402948 | MN194351 | MN194316 | MH403175 | MK434410 | MH402961 | MH403540 | MH403353 |
| MK434377 | MH403392 | MH403372 | MN194264 | MH402868 | MK434343 | MH402842 | MH403498 | MH403314 |
| MK434527 | MH402940 | MH403403 | MN194277 | MH402959 | MK434339 | MN194371 | MH403539 | MH403560 |
| MK434528 | MH403351 | MH403278 | MN194278 | MH402878 | MK434344 | MH402929 | MH403523 | MH403254 |
| MK434530 | MH403393 | MH403404 | MN194326 | MH403447 | MK434363 | MH402846 | MH403541 | MH403462 |
| MK434531 | MH403183 | MH403406 | MN194327 | MH402951 | MK434340 | MH402832 | MH403537 | MH403167 |
| MK434529 | MH403551 | MH403373 | MN194337 | MH402962 | MK434375 | MH403415 | MH403512 | MH403426 |
| MK434517 | MH403552 | MH403279 | MN194279 | MH402840 | MK434341 | MH402874 | MH402996 | MH403224 |
| MN194262 | MH402941 | MH403280 | MN194328 | MH403322 | MK434358 | MH403186 | MH402967 | MH403315 |
| MK434522 | MH403432 | MH403333 | MN194317 | MH402954 | MK434353 | MH402848 | MH403486 | MH403427 |
| MK434532 | MH403394 | MH403374 | MN194287 | MH402857 | MK434345 | MH403410 | MH402969 | MH403316 |
| MK434533 | MH403553 | MH403375 | MN194318 | MH402957 | MK434468 | MK434466 | MH403162 | MN194366 |
| MK434523 | MH402949 | MH403251 | MN194319 | MH402864 | MK434471 | MK434457 | MH402799 | MN194301 |
| MK434538 | MH402942 | MH403281 | MN194320 | MH402963 | MK434461 | MK434465 | MH403272 | MN194304 |
| MK434536 | MH403359 | MH403282 | MN194329 | MH402960 | MK434514 | MK434476 | MH402823 | MN194309 |
| MK434540 | MH403416 | MH403468 | MN194321 | MH402885 | MK434561 | MK434502 | MH403408 | MN194272 |
| MK434539 | MH403325 | MH403283 | MN194338 | MH403188 | MK434440 | MK434462 | MH402872 | MN194300 |
| MK434564 | MH403395 | MH403284 | MN194340 | MH402795 | MK434440 | MK434554 | MH403402 | MN194368 |
| MK434543 | MH403326 | MH403285 | MN194322 | MH402803 | MK434469 | MK434449 | MH402998 | MN194299 |
| MK434537 | MH403360 | MH403286 | MN194323 | MH403189 | MK434470 | MK434442 | MH403001 | MN194302 |
| MK434541 | MH403327 | MH403287 | MN194330 | MH403460 | MK434544 | MK434450 | MH403547 | MN194297 |
| MK434359 | MH402944 | MH403288 | MN194331 | MH402858 | MK434508 | MK434452 | MH403461 | MN194303 |
| MK434342 | MH403429 | MH403289 | MN194280 | MH403197 | MK434504 | MK434501 | MH403208 | MN194365 |
| MK434348 | MH403384 | MH403290 | MN194332 | MH403348 | MK434535 | MK434463 | MH403191 | MN194344 |
| MK434483 | MH403417 | MH403376 | MN194281 | MH402997 | MK434513 | MK434467 | MH403240 | MK434495 |
| MK434496 | MH402945 | MH403291 | MN194282 | MH402934 | MK434545 | MK434460 | MH403234 | MK434490 |
| MK434542 | MH402943 | MH403329 | MN194283 | MH402835 | MK434562 | MK434481 | MN194362 | MK434491 |
| MN194276 | MH403464 | MH403292 | MN194284 | MH402869 | MK434472 | MK434487 | MH403209 | MK434548 |
| MN194261 | MH402946 | MH403293 | MN194334 | MH403323 | MK434499 | MK434346 | MN194359 | MK434415 |
| MN194342 | MH403349 | MH403383 | MN194341 | MH402886 | MK434448 | MK434421 | MH403002 | MK434506 |
| MN194288 | MH403344 | MH403294 | MN194324 | MH402918 | MN194305 | MK434556 | MH403459 | MK434507 |
| MN194370 | MH403345 | MH403334 | MN194263 | MH402789 | MN194270 | MK434445 | MH403355 | MK434512 |
| MH402923 | MH403328 | MH403295 | MN194285 | MH402798 | MN194306 | MK434497 | MH403455 | MK434510 |
| MH403230 | MH403470 | MH403196 | MN194286 | MH403379 | MN194310 | MK434503 | MH403168 | MK434451 |
| MH402807 | MH403466 | MH403296 | MN194363 | MH402870 | MN194372 | MK434414 | MH403177 | MK434446 |
| MH403163 | MH403543 | MH403297 | MN194364 | MH402790 | MN194268 | MK434347 | MH403223 | MK434509 |

|          |          |          |          |          |          |          |          |          |
|----------|----------|----------|----------|----------|----------|----------|----------|----------|
| MH403331 | MH403536 | MH403190 | MK434379 | MH403354 | MN194267 | MK434559 | MH403219 | MK434380 |
| MH402782 | MH403465 | MH403242 | MK434473 | MH402965 | MN194293 | MK434474 | MH403243 | MK434423 |
| MH403445 | MH403472 | MH403463 | MK434413 | MH402958 | MN194296 | MK434475 | MH403247 | MK434412 |
| MH402828 | MH403519 | MH403235 | MK434505 | MH403546 | MN194289 | MK434488 | MN194354 | MK434560 |
| MH402783 | MH403516 | MH403256 | MK434477 | MH402964 | MN194269 | MK434557 | MH403210 | MK434401 |
| MH402784 | MH403473 | MH403252 | MK434418 | MH403341 | MN194265 | MK434489 | MH403244 | MK434443 |
| MH402829 | MH403500 | MH403434 | MK434456 | MH402966 | MN194298 | MK434422 | MH403356 | MK434409 |
| MH403352 | MH403157 | MH403436 | MK434419 | MH402797 | MN194294 | MK434555 | MH403169 | MH403457 |
| MH402785 | MH403507 | MN194361 | MK434441 | MH402879 | MN194307 | MK434480 | MH403158 | MH403248 |
| MH402808 | MH403513 | MH403165 | MK434459 | MH402836 | MN194271 | MK434547 | MN194356 | MH403245 |
| MH402802 | MH403515 | MH403298 | MK434354 | MH402884 | MN194290 | MK434558 | MH403003 |          |
| MH402880 | MH403509 | MH403226 | MK434420 | MH402871 | MN194369 | MK434492 | MH403211 |          |
| MH402809 | MH403522 | MH403422 | MK434546 | MH402786 | MN194367 | MK434493 | MH403184 |          |
| MH402925 | MH403488 | MH403204 | MK434486 | MH402801 | MN194295 | MK434390 | MH403170 |          |
| MH402810 | MH403532 | MH403299 | MK434464 | MH403448 | MN194308 | MK434494 | MH403205 |          |
